# Supplementary material
Source: PubMed Central journal article supplement (PMC7261419)
Supplement: NIHMS1592104-supplement-Supplementary_material.pdf [file NIHMS1592104-supplement-Supplementary_material.pdf]

# Supplementary Materials for “Adjusted Time-varying Population Attributable Hazard in Case-Control Studies”

# APPENDIX A: PROOF OF THEOREM 1: STRONG UNIFORM CONSISTENCY OF THE PROPOSED ESTIMATORS

We assume the number of cases  $n_1$  and total number of subjects  $n$  satisfy  $n_1/n \rightarrow \pi_0$  as  $n \rightarrow \infty$ , where  $0 < \pi_0 < 1$ . In addition we assume the following regularity conditions:

- A1. The time  $t$  is in a range of  $[0, \tau]$  for a constant  $\tau > 0$  such that the density of failure time  $f_T(t)$ , the density of censoring time  $f_C(t)$  and their survival functions,  $S_T(t)$  and  $S_C(t)$  all take positive real values on  $[0, \tau]$ .
- A2. The density of failure time  $f_T(t)$  and the density of censoring time  $f_C(t)$  are both continuous, uniformly bounded, and have second derivatives on  $[0, \tau]$ .
- A3. Random censoring: the censoring time  $C$  is independent of the failure time  $T$ , exposure  $\mathbf{Z}$  and confounder  $\mathbf{U}$  for  $t \in [0, \tau]$ .
- A4. The bandwidth satisfies  $h = n^d h_0$  for constants  $-1/2 < d < -1/5$  and  $h_0 > 0$ .
- A5. The kernel function  $K(\cdot)$  has bounded variation and satisfies the following conditions,

$$\begin{aligned} \int_{-\infty}^{\infty} K(u)du &= 1, & \int_{-\infty}^{\infty} K^2(u)du &< \infty, \\ \int_{-\infty}^{\infty} uK(u)du &= 0, & \int_{-\infty}^{\infty} u^2K(u)du &< \infty. \end{aligned}$$

- A6.  $\mathbf{Z}$  and  $\mathbf{U}$  are bounded almost surely and have uniformly bounded total variation on  $[0, \tau]$ .

Consider  $n$  subjects in a case-control study. Let  $X_i$ ,  $\Delta_i$ ,  $\mathbf{Z}_i$  and  $\mathbf{U}_i$  be the observed time, the censoring indicator, the exposure and confounders, respectively, for  $i = 1, \dots, n$ . We define the following notation.

$$\begin{aligned}
A_n(t; \boldsymbol{\beta}) &= \frac{1}{n} \sum_{i=1}^n \Delta_i K_h(t - X_i) \{1 - \exp(-\boldsymbol{\beta}^T \mathbf{Z}_i)\}, \\
B_n(t) &= \frac{1}{n} \sum_{i=1}^n \Delta_i K_h(t - X_i), \\
C_n(t) &= \frac{1}{n} \sum_{i=1}^n \Delta_i K_h(t - X_i) \{\exp(-\boldsymbol{\beta}_0^T \mathbf{Z}_i) - \exp(-\hat{\boldsymbol{\beta}}^T \mathbf{Z}_i)\}, \\
\mathbf{D}_n(t; \boldsymbol{\beta}) &= \frac{1}{n} \sum_{i=1}^n \Delta_i K_h(t - X_i) \mathbf{Z}_i \exp(-\boldsymbol{\beta}^T \mathbf{Z}_i), \\
\bar{A}_n(t; \boldsymbol{\beta}, \boldsymbol{\gamma}) &= \frac{1}{n} \sum_{i=1}^n (1 - \Delta_i) K_h(t - X_i) \exp(\boldsymbol{\beta}^T \mathbf{Z}_i + \boldsymbol{\gamma}^T \mathbf{U}_i), \\
\bar{B}_n(t) &= \frac{1}{n} \sum_{i=1}^n (1 - \Delta_i) K_h(t - X_i), \\
\bar{C}_n(t) &= \frac{1}{n} \sum_{i=1}^n (1 - \Delta_i) K_h(t - X_i) \{\exp(\hat{\boldsymbol{\beta}}^T \mathbf{Z}_i + \hat{\boldsymbol{\gamma}}^T \mathbf{U}_i) - \exp(\boldsymbol{\beta}_0^T \mathbf{Z}_i + \boldsymbol{\gamma}_0^T \mathbf{U}_i)\}, \\
\bar{\mathbf{D}}_n(t; \boldsymbol{\theta}) &= \frac{1}{n} \sum_{i=1}^n (1 - \Delta_i) K_h(t - X_i) \mathbf{V}_i \exp(\boldsymbol{\theta}^T \mathbf{V}_i), \\
\bar{E}_n(t; \boldsymbol{\gamma}) &= \frac{1}{n} \sum_{i=1}^n (1 - \Delta_i) K_h(t - X_i) \exp(\boldsymbol{\gamma}^T \mathbf{U}_i), \\
\bar{F}_n(t) &= \frac{1}{n} \sum_{i=1}^n (1 - \Delta_i) K_h(t - X_i) \{\exp(\hat{\boldsymbol{\gamma}}^T \mathbf{U}_i) - \exp(\boldsymbol{\gamma}_0^T \mathbf{U}_i)\}, \\
\bar{\mathbf{G}}_n(t; \boldsymbol{\gamma}) &= \frac{1}{n} \sum_{i=1}^n (1 - \Delta_i) K_h(t - X_i) \mathbf{U}_i \exp(\boldsymbol{\gamma}^T \mathbf{U}_i).
\end{aligned}$$

We use  $P_0$  and  $E_0$  to denote the probability and expectation with respect to the target population from which cases and controls are sampled. It is also useful to regard cases

and controls as members of a second, hypothetical population of individuals whose disease probability is given by  $\pi_0$  (Zhao et al. 2017). We use  $P^*$  and  $E^*$  to denote the probability and expectation with respect to this hypothetical population. Let  $p_0 = P_0(T \leq C)$ ,  $\pi_0 = P^*(T \leq C)$ . Then the limits of  $A_n(t; \boldsymbol{\beta})$ ,  $B_n(t)$ ,  $\mathbf{D}_n(t; \boldsymbol{\theta})$ ,  $\bar{A}_n(t; \boldsymbol{\beta}, \boldsymbol{\gamma})$ ,  $\bar{B}_n(t)$ ,  $\bar{\mathbf{D}}_n(t; \boldsymbol{\beta}, \boldsymbol{\gamma})$ ,  $\bar{E}_n(t; \boldsymbol{\gamma})$  and  $\bar{\mathbf{G}}_n(t; \boldsymbol{\gamma})$  are denoted by

$$\begin{aligned}
A(t) &= \phi_{adj}(t) f_T(t) S_C(t) \pi_0 / p_0, \\
B(t) &= f_T(t) S_C(t) \pi_0 / p_0, \\
\mathbf{D}(t; \boldsymbol{\beta}) &= \left\{ \int_{\mathcal{Z}} \mathbf{z} \exp(-\boldsymbol{\beta}^T \mathbf{z}) dF_{\mathbf{z}|T}(\mathbf{z}|t) \right\} f_T(t) S_C(t) \pi_0 / p_0, \\
\bar{A}(t) &= \psi(t) f_C(t) S_T(t) (1 - \pi_0) / (1 - p_0), \\
\bar{B}(t) &= f_C(t) S_T(t) (1 - \pi_0) / (1 - p_0), \\
\bar{\mathbf{D}}(t; \boldsymbol{\theta}) &= \left\{ \int_{\mathcal{V}} \mathbf{v} \exp(\boldsymbol{\theta}^T \mathbf{v}) dF_{\mathbf{v}|T \geq t}(\mathbf{v}) \right\} f_C(t) S_T(t) (1 - \pi_0) / (1 - p_0), \\
\bar{E}(t) &= v(t) f_C(t) S_T(t) (1 - \pi_0) / (1 - p_0), \\
\bar{\mathbf{G}}(t; \boldsymbol{\gamma}) &= \left\{ \int_{\mathcal{U}} \mathbf{u} \exp(-\boldsymbol{\gamma}^T \mathbf{u}) dF_{\mathbf{u}|T}(\mathbf{u}|t) \right\} f_C(t) S_T(t) (1 - \pi_0) / (1 - p_0).
\end{aligned}$$

We first present the following lemmas before proving Theorem 1.

**Lemma 1.1.** Suppose assumptions A1-A6 are satisfied. Then,

$$\begin{aligned}
\sup_{t \in [0, \tau]} \left| \hat{\varphi}(t; \hat{\boldsymbol{\beta}}) - \varphi(t) \right| &\rightarrow 0 \text{ a.s.} \\
\sup_{t \in [0, \tau]} \left| \hat{v}(t; \hat{\boldsymbol{\gamma}}) - v(t) \right| &\rightarrow 0 \text{ a.s.}
\end{aligned}$$

as  $n \rightarrow \infty$ .

**Proof.** The uniform consistency of  $B_n(t)$  has been shown in Lemma 1.1 in Zhao et al. (2017). Hence as argued in Lemma 1.2 in Zhao et al. (2017), it suffices to show the consistency of the numerator  $A_n(t; \hat{\boldsymbol{\beta}})$ . To simplify the notation, unless otherwise specified,

the integration with respect to  $x$  is from 0 to  $\infty$ , integration with respect to  $\mathbf{z}$  is on its support  $\mathcal{Z}$  and integration with respect to  $\mathbf{u}$  is on its support  $\mathcal{U}$  through out the proofs in this article.

Note that  $A_n(t; \hat{\boldsymbol{\beta}}) = A_n(t; \boldsymbol{\beta}_0) - C_n(t)$ . The first term has expectation

$$\begin{aligned}
E^* \{A_n(t; \boldsymbol{\beta}_0)\} &= E^* \{\Delta K_h(t - X) \exp(-\boldsymbol{\beta}_0^T \mathbf{Z})\} \\
&= E^* \{K_h(t - T) \exp(-\boldsymbol{\beta}_0^T \mathbf{Z}) | T \leq C\} P^*(T \leq C) \\
&= \frac{\pi_0}{h} \int \int \exp(-\boldsymbol{\beta}_0^T \mathbf{z}) K\left(\frac{t-x}{h}\right) f_{T, \mathbf{z} | T \leq C}(x, \mathbf{z}) dx d\mathbf{z} \\
&= \frac{\pi_0}{h} \int \int \exp(-\boldsymbol{\beta}_0^T \mathbf{z}) K\left(\frac{t-x}{h}\right) \frac{f_{T | \mathbf{z}}(x | \mathbf{z}) S_C(x) f_{\mathbf{z}}(\mathbf{z})}{P(T \leq C)} dx d\mathbf{z} \\
&= \frac{1}{h} \int K\left(\frac{t-x}{h}\right) f_T(x) S_C(x) \pi_0 / p_0 \int \exp(-\boldsymbol{\beta}_0^T \mathbf{z}) f_{\mathbf{z} | T}(\mathbf{z} | x) d\mathbf{z} dx, \\
&= \frac{1}{h} \int K\left(\frac{t-x}{h}\right) A(x) dx.
\end{aligned}$$

Using the same arguments as in Lemma 1.1 and 1.2 in Zhao et al. (2017), we can conclude that

$$\sup_{t \in [0, \tau]} |A_n(t; \boldsymbol{\beta}_0) - A(t)| \rightarrow 0 \text{ a.s.} \tag{A.1}$$

as  $n \rightarrow \infty$ , given  $K(\cdot)$  has bounded variation, and  $\mathbf{Z}$  is bounded almost surely.

By using Taylor's expansion, the second term  $C_n(t)$  can be written as

$$\begin{aligned}
C_n(t) &= \frac{1}{n} \sum_{i=1}^n \{\exp(-\boldsymbol{\beta}_0^T \mathbf{Z}_i) - \exp(-\hat{\boldsymbol{\beta}}^T \mathbf{Z}_i)\} \Delta_i K_h(t - X_i) \\
&= (\hat{\boldsymbol{\beta}} - \boldsymbol{\beta}_0)^T \mathbf{D}_n(t; \boldsymbol{\beta}_0) + o_p(1).
\end{aligned}$$

Consistency of  $\mathbf{D}_n(t; \boldsymbol{\beta})$  can be established similarly as in the proof of Lemma 1.3 in Zhao

et al. (2017), by noticing that

$$\begin{aligned}
E^*\{\mathbf{D}_n(t; \boldsymbol{\beta})\} &= E^*\{\mathbf{Z}_i \exp(-\boldsymbol{\beta}^T \mathbf{Z}_i) \Delta_i K_h(t - X_i)\} \\
&= E^*\{\mathbf{Z}_i \exp(-\boldsymbol{\beta}^T \mathbf{Z}_i) K_h(t - X_i) | T \leq C\} P^*(T \leq C) \\
&= \frac{\pi_0}{h} \int \int \{\mathbf{z} \exp(-\boldsymbol{\beta}^T \mathbf{z})\} K\left(\frac{t-x}{h}\right) f_{T, \mathbf{Z} | T \leq C}(x, \mathbf{z}) dx d\mathbf{z} \\
&= \frac{1}{h} \int K\left(\frac{t-x}{h}\right) \mathbf{D}(x; \boldsymbol{\beta}) dx,
\end{aligned}$$

$\mathbf{D}(t; \boldsymbol{\beta})$  is continuous for  $t$ , and  $\mathbf{Z}$  is bounded almost surely. By the strong consistency of  $\hat{\boldsymbol{\beta}}$  and the continuous mapping theorem, we have

$$\sup_{t \in [0, \tau]} |C_n(t)| \rightarrow 0 \text{ a.s.} \quad (\text{A.2})$$

as  $n \rightarrow \infty$ . Putting (A.1) and (A.2) together, we conclude that

$$\sup_{t \in [0, \tau]} |A_n(t; \hat{\boldsymbol{\beta}}) - A(t)| \rightarrow 0 \text{ a.s.}$$

as  $n \rightarrow \infty$ .

Similarly, by replacing  $\boldsymbol{\theta}$  and  $\mathbf{V}_i$  with  $\boldsymbol{\gamma}$  and  $\mathbf{U}_i$  respectively, we can prove  $\sup_{t \in [0, \tau]} |\hat{v}(t; \hat{\boldsymbol{\gamma}}) - v(t)| \rightarrow 0 \text{ a.s.}$  Lemma 1.1 is proved.

**Lemma 1.2.** Suppose assumptions A1-A6 are satisfied. Then,

$$\sup_{t \in [0, \tau]} |\hat{\psi}(t; \hat{\boldsymbol{\beta}}, \hat{\boldsymbol{\gamma}}) - \psi(t)| \rightarrow 0 \text{ a.s.}$$

as  $n \rightarrow \infty$ .

**Proof.** Uniform consistency of  $\bar{B}_n(t)$  can be shown following the similar argument of

proving the uniform consistency of  $B_n(t)$ , so it suffices to show the consistency of the numerator  $\bar{A}_n(t; \hat{\boldsymbol{\beta}}, \hat{\boldsymbol{\gamma}})$ . Note that  $\bar{A}_n(t; \hat{\boldsymbol{\beta}}, \hat{\boldsymbol{\gamma}}) = \bar{A}_n(t; \boldsymbol{\beta}_0, \boldsymbol{\gamma}_0) + \bar{C}_n(t)$ . The expectation of  $\bar{A}_n(t; \boldsymbol{\beta}_0, \boldsymbol{\gamma}_0)$  equals

$$\begin{aligned}
E^* \{\bar{A}_n(t; \boldsymbol{\beta}_0, \boldsymbol{\gamma}_0)\} &= E^* \{(1 - \Delta) K_h(t - X) \exp(\boldsymbol{\beta}_0^T \mathbf{Z} + \boldsymbol{\gamma}_0^T \mathbf{U})\} \\
&= E^* \{K_h(t - T) \exp(\boldsymbol{\beta}_0^T \mathbf{Z} + \boldsymbol{\gamma}_0^T \mathbf{U}) | C \leq T\} P^*(C \leq T) \\
&= \frac{1 - \pi_0}{h} \int \int \int \exp(\boldsymbol{\beta}_0^T \mathbf{z} + \boldsymbol{\gamma}_0^T \mathbf{u}) K\left(\frac{t - x}{h}\right) f_{C, \mathbf{Z}, \mathbf{U} | C \leq T}(x, \mathbf{z}, \mathbf{u}) dx d\mathbf{z} d\mathbf{u} \\
&= \frac{1 - \pi_0}{1 - p_0} \frac{1}{h} \int \int \int \exp(\boldsymbol{\beta}_0^T \mathbf{z} + \boldsymbol{\gamma}_0^T \mathbf{u}) K\left(\frac{t - x}{h}\right) \frac{f_C(x) S_T(x) f_{\mathbf{Z}, \mathbf{U}}(\mathbf{z}, \mathbf{u})}{P(T \leq C)} dx d\mathbf{z} d\mathbf{u} \\
&= \frac{1}{h} \int K\left(\frac{t - x}{h}\right) A(x) dx.
\end{aligned}$$

Using the same arguments as in Lemma 1.1 and 1.2 in Zhao et al. (2017), we conclude that

$$\sup_{t \in [0, \tau]} |\bar{A}_n(t; \boldsymbol{\beta}_0, \boldsymbol{\gamma}_0) - \bar{A}(t)| \rightarrow 0 \text{ a.s.} \quad (\text{A.3})$$

as  $n \rightarrow \infty$ , given  $K(\cdot)$  has bounded variation, and  $\mathbf{Z}$  and  $\mathbf{U}$  are both bounded almost surely.

By using Taylor's expansion, the second term  $\bar{C}_n(t)$  can be written as

$$\begin{aligned}
\bar{C}_n(t) &= \frac{1}{n} \sum_{i=1}^n \{\exp(\hat{\boldsymbol{\theta}}^T \mathbf{V}_i) - \exp(\boldsymbol{\theta}_0^T \mathbf{V}_i)\} (1 - \Delta_i) K_h(t - X_i) \\
&= (\hat{\boldsymbol{\theta}} - \boldsymbol{\theta}_0)^T \bar{\mathbf{D}}_n(t; \boldsymbol{\theta}_0) + o_p(1).
\end{aligned}$$

The consistency of  $\bar{\mathbf{D}}_n(t; \boldsymbol{\theta})$  can be established similarly as in the proof of Lemma 1.1, and by the strong consistency of  $\hat{\boldsymbol{\theta}}$  and the continuous mapping theorem, we conclude that

$$\sup_{t \in [0, \tau]} |\bar{C}_n(t)| \rightarrow 0 \text{ a.s.} \quad (\text{A.4})$$

as  $n \rightarrow \infty$ . Putting (A.3) and (A.4) together, we conclude that

$$\sup_{t \in [0, \tau]} |\bar{A}_n(t; \hat{\boldsymbol{\beta}}, \hat{\boldsymbol{\gamma}}) - \bar{A}(t)| \rightarrow 0 \text{ a.s.}$$

as  $n \rightarrow 0$ . Lemma 1.2 is proved.

**Proof of Theorem 1.** By applying Lemma 1.1 and Lemma 1.2, and using the continuous mapping theorem, we conclude that  $\widehat{\phi}_{adj+}(t; \widehat{\boldsymbol{\beta}})$  and  $\widehat{\phi}_{adj-}(t; \widehat{\boldsymbol{\beta}}, \widehat{\boldsymbol{\gamma}})$  are consistent for  $\phi_{adj}(t)$  uniformly on  $t \in [0, \tau]$ . As a weighted sum of  $\widehat{\phi}_{adj+}(t; \widehat{\boldsymbol{\beta}})$  and  $\widehat{\phi}_{adj-}(t; \widehat{\boldsymbol{\beta}}, \widehat{\boldsymbol{\gamma}})$  with fixed weights, it is easy to prove  $\widehat{\phi}_{adjw}(t; \widehat{\boldsymbol{\beta}}, \widehat{\boldsymbol{\gamma}})$  is uniformly consistent for  $\phi_{adj}(t)$  on  $t \in [0, \tau]$ . Theorem 1 is proved.

## APPENDIX B: PROOF OF THEOREM 2: ASYMPTOTIC NORMALITY OF THE PROPOSED ESTIMATORS

**Proof.** Let  $t \in [0, \tau]$ . The asymptotic normality of  $\sqrt{nh}\{\widehat{\phi}_{adj+}(t; \widehat{\boldsymbol{\beta}}) - \phi_{adj}(t)\}$  can be obtained using the same argument as in the proof of Theorem 2 in Zhao et al. (2017). Specifically, we have

$$\sqrt{nh}\{\widehat{\phi}_{adj+}(t; \widehat{\boldsymbol{\beta}}) - \phi_{adj}(t)\} = \sqrt{nh}\{\widehat{\phi}_{adj+}(t; \widehat{\boldsymbol{\beta}}) - \widehat{\phi}_{adj+}(t; \boldsymbol{\beta}_0)\} + \sqrt{nh}\{\widehat{\phi}_{adj+}(t; \boldsymbol{\beta}_0) - \phi_{adj}(t)\}$$

where the first part vanishes and the second part converges to a normal distribution as  $n \rightarrow 0$ .



Now we prove the asymptotic normality of  $\widehat{\phi}_{adj-}(t; \widehat{\boldsymbol{\beta}}, \widehat{\boldsymbol{\gamma}})$ . Write

$$\begin{aligned} \sqrt{nh}\{\widehat{\phi}_{adj-}(t; \widehat{\boldsymbol{\beta}}, \widehat{\boldsymbol{\gamma}}) - \phi_{adj}(t)\} &= -\sqrt{nh}\{\widehat{\psi}^{-1}(t; \widehat{\boldsymbol{\beta}}, \widehat{\boldsymbol{\gamma}})\widehat{v}(t; \widehat{\boldsymbol{\gamma}}) - \psi^{-1}(t)v(t)\} \\ &= -\sqrt{nh}\left\{\frac{\overline{E}_n(t; \widehat{\boldsymbol{\gamma}})}{\overline{A}_n(t; \widehat{\boldsymbol{\beta}}, \widehat{\boldsymbol{\gamma}})} - \psi^{-1}(t)v(t)\right\} \\ &= -\sqrt{nh}\left\{\frac{\overline{E}_n(t; \widehat{\boldsymbol{\gamma}}) - \psi^{-1}(t)v(t)\overline{A}_n(t; \widehat{\boldsymbol{\beta}}, \widehat{\boldsymbol{\gamma}})}{\overline{A}_n(t; \widehat{\boldsymbol{\beta}}, \widehat{\boldsymbol{\gamma}})}\right\}. \end{aligned}$$

The consistency of  $\overline{A}_n(t; \widehat{\boldsymbol{\beta}}, \widehat{\boldsymbol{\gamma}})$  has been shown in the proof of Lemma 1.2, so it suffices to study the asymptotic normality of  $\sqrt{nh}\{\overline{E}_n(t; \widehat{\boldsymbol{\gamma}}) - \psi^{-1}(t)v(t)\overline{A}_n(t; \widehat{\boldsymbol{\beta}}, \widehat{\boldsymbol{\gamma}})\}$ . Using the results in the previous proofs, we note that

$$\begin{aligned} &\sqrt{nh}\{\overline{E}_n(t; \widehat{\boldsymbol{\gamma}}) - \psi^{-1}(t)v(t)\overline{A}_n(t; \widehat{\boldsymbol{\beta}}, \widehat{\boldsymbol{\gamma}})\} \\ &= \sqrt{nh}\{\overline{E}_n(t; \boldsymbol{\gamma}_0) - \psi^{-1}(t)v(t)\overline{A}_n(t; \boldsymbol{\beta}_0, \boldsymbol{\gamma}_0)\} + \sqrt{nh}\{\overline{F}_n(t) - \psi^{-1}(t)v(t)\overline{C}_n(t)\} \\ &= \sqrt{nh}\{\overline{E}_n(t; \boldsymbol{\gamma}_0) - \psi^{-1}(t)v(t)\overline{A}_n(t; \boldsymbol{\beta}_0, \boldsymbol{\gamma}_0)\} + o_p(1), \end{aligned}$$

so the asymptotic normality of  $\sqrt{nh}\{\overline{E}_n(t; \widehat{\boldsymbol{\gamma}}) - \psi^{-1}(t)v(t)\overline{A}_n(t; \widehat{\boldsymbol{\beta}}, \widehat{\boldsymbol{\gamma}})\}$  only depends on  $\sqrt{nh}\{\overline{E}_n(t; \boldsymbol{\gamma}_0) - \psi^{-1}(t)v(t)\overline{A}_n(t; \boldsymbol{\beta}_0, \boldsymbol{\gamma}_0)\}$ . Let

$$e_{n,i}(t) = \sqrt{\frac{h}{n}}\{\exp(\boldsymbol{\gamma}_0^T \mathbf{U}_i) - \psi^{-1}(t)v(t)\exp(\boldsymbol{\beta}_0^T \mathbf{Z}_i + \boldsymbol{\gamma}_0 \mathbf{U}_i)\}(1 - \Delta_i)K_h(t - X_i),$$

so that  $\sqrt{nh}\{\overline{E}_n(t; \boldsymbol{\gamma}_0) - \psi^{-1}(t)v(t)\overline{A}_n(t; \boldsymbol{\beta}_0, \boldsymbol{\gamma}_0)\} = \sum_{i=1}^n e_{n,i}(t)$ . We will set forth the Lyapunov' conditions. Let  $g(\mathbf{u}, \mathbf{z}; t) = \exp(\boldsymbol{\gamma}_0^T \mathbf{u}) - \psi^{-1}(t)v(t)\exp(\boldsymbol{\beta}_0^T \mathbf{z} + \boldsymbol{\gamma}_0^T \mathbf{u})$ . Then we

have

$$\begin{aligned}
E^*\{e_{n,i}(t)\} &= \sqrt{\frac{h}{n}} E^* [\{\exp(\boldsymbol{\gamma}_0^T \mathbf{U}) - \psi^{-1}(t)v(t) \exp(\boldsymbol{\beta}_0^T \mathbf{Z} + \boldsymbol{\gamma}_0^T \mathbf{U})\}(1 - \Delta)K_h(t - X)] \\
&= \frac{1 - \pi_0}{\sqrt{nh}} \int \int \int g(\mathbf{u}, \mathbf{z}; t) K\left(\frac{t - x}{h}\right) f_{C, \mathbf{Z}, \mathbf{U} | C \leq T}(x, \mathbf{z}, \mathbf{u}) dx d\mathbf{z} d\mathbf{u} \\
&= \frac{1 - \pi_0}{\sqrt{nh}(1 - p_0)} \int \int \int g(\mathbf{u}, \mathbf{z}; t) K\left(\frac{t - x}{h}\right) f_C(x) S_{T|\mathbf{Z}, \mathbf{U}}(x|\mathbf{z}, \mathbf{u}) f_{\mathbf{Z}, \mathbf{U}}(\mathbf{z}, \mathbf{u}) dx d\mathbf{z} d\mathbf{u} \\
&= \frac{1 - \pi_0}{1 - p_0} \sqrt{\frac{h}{n}} \int \int \int g(\mathbf{u}, \mathbf{z}; t) K(y) f_C(t - yh) S_{T|\mathbf{Z}, \mathbf{U}}(t - yh|\mathbf{z}, \mathbf{u}) f_{\mathbf{Z}, \mathbf{U}}(\mathbf{z}, \mathbf{u}) dy d\mathbf{z} d\mathbf{u} \\
&\quad \text{by letting } y = \frac{t - x}{h}, \\
&= \frac{1 - \pi_0}{1 - p_0} \sqrt{\frac{h}{n}} \left\{ \int \int g(\mathbf{u}, \mathbf{z}; t) f_C(t) S_{T|\mathbf{Z}, \mathbf{U}}(t|\mathbf{z}, \mathbf{u}) f_{\mathbf{Z}, \mathbf{U}}(\mathbf{z}, \mathbf{u}) d\mathbf{z} d\mathbf{u} + O(h^2) \right\} \\
&\quad \text{by the Taylor's expansion,} \\
&= \frac{1 - \pi_0}{1 - p_0} \sqrt{\frac{h}{n}} O(h^2) = O(\sqrt{h^5/n}).
\end{aligned}$$

The last step comes from the fact that

$$\begin{aligned}
&\int \int g(\mathbf{u}, \mathbf{z}; t) f_C(t) S_{T|\mathbf{Z}, \mathbf{U}}(t|\mathbf{z}, \mathbf{u}) f_{\mathbf{Z}, \mathbf{U}}(\mathbf{z}, \mathbf{u}) d\mathbf{z} d\mathbf{u} \\
&= \int \int \{\exp(\boldsymbol{\gamma}_0^T \mathbf{u}) - \psi^{-1}(t)v(t) \exp(\boldsymbol{\beta}_0^T \mathbf{z} + \boldsymbol{\gamma}_0^T \mathbf{u})\} f_C(t) S_{T|\mathbf{Z}, \mathbf{U}}(t|\mathbf{z}, \mathbf{u}) f_{\mathbf{Z}, \mathbf{U}}(\mathbf{z}, \mathbf{u}) d\mathbf{z} d\mathbf{u} \\
&= f_C(t) S_T(t) \int \int \{\exp(\boldsymbol{\gamma}_0^T \mathbf{u}) - \psi^{-1}(t)v(t) \exp(\boldsymbol{\beta}_0^T \mathbf{z} + \boldsymbol{\gamma}_0^T \mathbf{u})\} f_{\mathbf{Z}, \mathbf{U} | T \geq t}(\mathbf{z}, \mathbf{u}) d\mathbf{z} d\mathbf{u} \\
&= f_C(t) S_T(t) \{v(t) - \psi^{-1}(t)v(t) \cdot \psi(t)\} = 0.
\end{aligned}$$

Similarly, we have

$$\begin{aligned}
E^* \{e_{n,i}^2(t)\} &= \frac{h}{n} E^* [\{\exp(\boldsymbol{\gamma}_0^T \mathbf{U}) - \psi^{-1}(t)v(t) \exp(\boldsymbol{\beta}_0^T \mathbf{Z} + \boldsymbol{\gamma}_0^T \mathbf{U})\}^2 (1 - \Delta)^2 K_h^2(t - X)] \\
&= \frac{1 - \pi_0}{nh} \int \int \int g^2(\mathbf{u}, \mathbf{z}; t) K^2\left(\frac{t-x}{h}\right) f_{C, \mathbf{Z}, \mathbf{U} | C \leq T}(x, \mathbf{z}, \mathbf{u}) dx d\mathbf{z} d\mathbf{u} \\
&= \frac{1 - \pi_0}{nh(1 - p_0)} \int \int \int g^2(\mathbf{u}, \mathbf{z}; t) K^2\left(\frac{t-x}{h}\right) f_C(x) S_{T|\mathbf{Z}, \mathbf{U}}(x|\mathbf{z}, \mathbf{u}) f_{\mathbf{Z}, \mathbf{U}}(\mathbf{z}, \mathbf{u}) dx d\mathbf{z} d\mathbf{u} \\
&= \frac{1 - \pi_0}{n(1 - p_0)} \int \int \int g^2(\mathbf{u}, \mathbf{z}; t) K^2(y) f_C(t - yh) S_{T|\mathbf{Z}, \mathbf{U}}(t - yh|\mathbf{z}, \mathbf{u}) f_{\mathbf{Z}, \mathbf{U}}(\mathbf{z}, \mathbf{u}) dy d\mathbf{z} d\mathbf{u} \\
&\quad \text{by letting } y = \frac{t-x}{h}, \\
&= \frac{1 - \pi_0}{n(1 - p_0)} \left\{ \int \int g^2(\mathbf{u}, \mathbf{z}; t) f_C(t) S_{T|\mathbf{Z}, \mathbf{U}}(t|\mathbf{z}, \mathbf{u}) f_{\mathbf{Z}, \mathbf{U}}(\mathbf{z}, \mathbf{u}) d\mathbf{z} d\mathbf{u} \int K^2(y) dy + O(h) \right\} \\
&\quad \text{by the Taylor's expansion,}
\end{aligned}$$

and

$$\begin{aligned}
E^* \{e_{n,i}^3(t)\} &= \left(\frac{h}{n}\right)^{3/2} E^* [\{\exp(\boldsymbol{\gamma}_0^T \mathbf{U}) - \psi^{-1}(t)v(t) \exp(\boldsymbol{\beta}_0^T \mathbf{Z} + \boldsymbol{\gamma}_0^T \mathbf{U})\}^3 (1 - \Delta)^3 K_h^3(t - X)] \\
&= \frac{1 - \pi_0}{1 - p_0} \left(\frac{1}{nh}\right)^{3/2} \int \int \int g^3(\mathbf{u}, \mathbf{z}; t) K^3\left(\frac{t-x}{h}\right) f_{C, \mathbf{Z}, \mathbf{U} | C \leq T}(x, \mathbf{z}, \mathbf{u}) dx d\mathbf{z} d\mathbf{u} \\
&= \frac{1 - \pi_0}{1 - p_0} \left(\frac{1}{nh}\right)^{3/2} \int \int \int g^3(\mathbf{u}, \mathbf{z}; t) K^3\left(\frac{t-x}{h}\right) f_C(x) S_{T|\mathbf{Z}, \mathbf{U}}(x|\mathbf{z}, \mathbf{u}) f_{\mathbf{Z}, \mathbf{U}}(\mathbf{z}, \mathbf{u}) dx d\mathbf{z} d\mathbf{u} \\
&= \frac{1 - \pi_0}{n\sqrt{nh}(1 - p_0)} \int \int \int g^3(\mathbf{u}, \mathbf{z}; t) K^3(y) f_C(t - yh) S_{T|\mathbf{Z}, \mathbf{U}}(t - yh|\mathbf{z}, \mathbf{u}) f_{\mathbf{Z}, \mathbf{U}}(\mathbf{z}, \mathbf{u}) dy d\mathbf{z} d\mathbf{u} \\
&\quad \text{by letting } y = \frac{t-x}{h}, \\
&= \frac{1 - \pi_0}{n\sqrt{nh}(1 - p_0)} \left\{ \int \int g^3(\mathbf{u}, \mathbf{z}; t) f_C(t) S_{T|\mathbf{Z}, \mathbf{U}}(t|\mathbf{z}, \mathbf{u}) f_{\mathbf{Z}, \mathbf{U}}(\mathbf{z}, \mathbf{u}) d\mathbf{z} d\mathbf{u} \int K^3(y) dy + O(h) \right\} \\
&\quad \text{by the Taylor's expansion.}
\end{aligned}$$

Given that

$$\begin{aligned}
\sum_{i=1}^n E^* \{e_{n,i}(t) - E^* e_{n,i}(t)\}^3 &= nE^* \{e_{n,i}(t)\}^3 - 3nE^* \{e_{n,i}(t)\}^2 E^* \{e_{n,i}(t)\} + 2n [E^* \{e_{n,i}(t)\}]^3 \\
&= O(1/\sqrt{nh}) + 3nO(1/n) \cdot O(\sqrt{h^5/n}) + 2nO((h/n)^{3/2}) \\
&= O(1/\sqrt{nh}),
\end{aligned}$$

and

$$\begin{aligned}
\sum_{i=1}^n Var^* \{e_{n,i}(t)\} &= nE^* \{e_{n,i}^2(t)\} - n[E^* \{e_{n,i}(t)\}]^2 \\
&= \frac{(1-\pi_0)}{(1-p_0)} \int \int g^2(\mathbf{u}, \mathbf{z}; t) f_C(t) S_{T|\mathbf{Z}, \mathbf{U}}(t|\mathbf{z}, \mathbf{u}) f_{\mathbf{Z}, \mathbf{U}}(\mathbf{z}, \mathbf{u}) d\mathbf{z} d\mathbf{u} \int K^2(y) dy + O(h) + O(h^5) \\
&= \sigma_E^2(t) + O(h),
\end{aligned}$$

where

$$\sigma_E^2(t) = \bar{B}(t) \int K^2(u) du \int \int \{\exp(\boldsymbol{\gamma}_0^T \mathbf{u}) - \psi^{-1}(t)v(t) \exp(\boldsymbol{\beta}_0^T \mathbf{z} + \boldsymbol{\gamma}_0^T \mathbf{u})\}^2 f_{\mathbf{Z}, \mathbf{U}|T \geq t}(\mathbf{z}, \mathbf{u}) d\mathbf{z} d\mathbf{u},$$

the Lyapunov's condition satisfies by verifying

$$\frac{\sum_{i=1}^n E^* \{e_{n,i}(t) - E^* e_{n,i}(t)\}^3}{[\sum_{i=1}^n Var^* \{e_{n,i}(t)\}]^{3/2}} = O(1/\sqrt{nh}) \rightarrow 0$$

as  $\sqrt{nh} \rightarrow \infty$ . Then by Lyapunov's Central Limit theorem and Slutsky's theorem, we conclude that

$$\sqrt{nh} \{\bar{E}_n(t; \boldsymbol{\gamma}_0) - \psi^{-1}(t)v(t)\bar{A}_n(t; \boldsymbol{\beta}_0, \boldsymbol{\gamma}_0)\} \rightarrow_d N(0, \sigma_E^2(t)),$$

and thereafter

$$\sqrt{nh} \{\hat{\phi}_{adj-}(t; \hat{\boldsymbol{\beta}}, \hat{\boldsymbol{\gamma}}) - \phi_{adj}(t)\} \rightarrow_d N(0, \sigma_-^2(t)),$$

where  $\sigma_-^2(t) = \sigma_E^2(t)\bar{A}^{-2}(t; \boldsymbol{\beta}_0, \boldsymbol{\gamma}_0)$ .

Write

$$\begin{aligned} & \sqrt{nh}\{\widehat{\phi}_{adjw}(t; \hat{\boldsymbol{\beta}}, \hat{\boldsymbol{\gamma}}) - \phi_{adj}(t)\} \\ = & \pi_0\sqrt{nh}\{\widehat{\phi}_{adj+}(t; \hat{\boldsymbol{\beta}}) - \phi_{adj}(t)\} + (1 - \pi_0)\sqrt{nh}\{\widehat{\phi}_{adj-}(t; \hat{\boldsymbol{\beta}}, \hat{\boldsymbol{\gamma}}) - \phi_{adj}(t)\}. \end{aligned} \quad (\text{A.5})$$

$$\begin{aligned} = & \pi_0[\sqrt{nh}\{\widehat{\phi}_{adj+}(t; \hat{\boldsymbol{\beta}}) - \widehat{\phi}_{adj+}(t; \boldsymbol{\beta}_0)\} + \sqrt{nh}\{\widehat{\phi}_{adj+}(t; \boldsymbol{\beta}_0) - \phi_{adj}(t)\}] \\ & - (1 - \pi_0) \left[ \frac{\sqrt{nh}\{\bar{E}_n(t; \boldsymbol{\gamma}_0) - \psi^{-1}(t)v(t)\bar{A}_n(t; \boldsymbol{\beta}_0, \boldsymbol{\gamma}_0)\} + \sqrt{nh}\{\bar{F}_n(t) - \psi^{-1}(t)v(t)\bar{C}_n(t)\}}{\bar{A}_n(t; \hat{\boldsymbol{\beta}}, \hat{\boldsymbol{\gamma}})} \right]. \end{aligned} \quad (\text{A.6})$$

The asymptotic normality of the two parts in (A.5) has been studied. Now we study the covariance between them. We have shown in the previous proofs that the asymptotic normality of  $\sqrt{nh}\{\widehat{\phi}_{adj+}(t; \hat{\boldsymbol{\beta}}) - \phi_{adj}(t)\}$  is determined by  $\sqrt{nh}\{\widehat{\phi}_{adj+}(t; \boldsymbol{\beta}_0) - \phi_{adj}(t)\}$  which only relies on the cases, and that of  $\sqrt{nh}\{\widehat{\phi}_{adj-}(t; \hat{\boldsymbol{\beta}}, \hat{\boldsymbol{\gamma}}) - \phi_{adj}(t)\}$  is determined by  $\sqrt{nh}\{\bar{E}_n(t; \boldsymbol{\gamma}_0) - \psi^{-1}(t)v(t)\bar{A}_n(t; \boldsymbol{\beta}_0, \boldsymbol{\gamma}_0)\}$  which only relies the controls. Therefore they are asymptotically independent. By multivariate central limit theorem,

$$\sqrt{nh}\{\widehat{\phi}_{adjw}(t; \hat{\boldsymbol{\beta}}, \hat{\boldsymbol{\gamma}}) - \phi_{adj}(t)\} \rightarrow_d N(0, \sigma_w^2(t)),$$

where

$$\sigma_w^2(t) = \pi_0^2\sigma_+^2(t) + (1 - \pi_0)^2\sigma_-^2(t).$$

Theorem 2 is proved.

# APPENDIX C: PROOF OF THEOREM 3: VARIANCE ESTIMATORS FOR THE PROPOSED ESTIMATORS

**Proof.** Using results in the proofs of Theorem 1 and Theorem 2 and with similar arguments, it is straightforward to show that  $\hat{\sigma}_+^{*2}(t; h)$ ,  $\hat{\sigma}_-^{*2}(t; h)$  and  $\hat{\sigma}_w^{*2}(t; h)$  are uniformly consistent for  $\sigma_+^2(t)$ ,  $\sigma_-^2(t)$  and  $\sigma_w^2(t)$ . Below we show how to derive the variance estimators under finite sampling  $\hat{\sigma}_+^{*2}(t; h)$ ,  $\hat{\sigma}_-^{*2}(t; h)$ , and  $\hat{\sigma}_w^{*2}(t; h)$ .

Note that in equation (A.6), we have

$$\sqrt{nh}\{\hat{\phi}_{adj+}(t; \hat{\boldsymbol{\beta}}) - \hat{\phi}_{adj+}(t; \boldsymbol{\beta}_0)\} = \sqrt{h}\{\sqrt{n}(\hat{\boldsymbol{\beta}} - \boldsymbol{\beta}_0)^T\} \mathbf{D}_n(t; \boldsymbol{\beta}_0) / B_n(t) + O_p(\sqrt{h/n}),$$

in which the first leading term goes to 0 in  $O(\sqrt{h})$  and under finite sampling does not converge to 0 quickly. So the variance under finite sampling would be approximately  $\sigma_+^2(t)$  plus a correction term from the variance of  $\sqrt{nh}\{\hat{\phi}_{adj+}(t; \hat{\boldsymbol{\beta}}) - \hat{\phi}_{adj+}(t; \boldsymbol{\beta}_0)\}$  and the covariance between  $\sqrt{nh}\{\hat{\phi}_{adj+}(t; \hat{\boldsymbol{\beta}}) - \hat{\phi}_{adj+}(t; \boldsymbol{\beta}_0)\}$  and  $\sqrt{nh}\{\hat{\phi}_{adj+}(t; \boldsymbol{\beta}_0) - \phi_{adj}(t)\}$ .

Using similar arguments in the proof of Theorem 2, it is straightforward to see that the limiting variance of  $\sqrt{nh}\{\hat{\phi}_{adj+}(t; \hat{\boldsymbol{\beta}}) - \hat{\phi}_{adj+}(t; \boldsymbol{\beta}_0)\}$  equals to  $\sigma_C^2(t; h)B^{-2}(t)$  and the limiting covariance between  $\sqrt{nh}\{\hat{\phi}_{adj+}(t; \hat{\boldsymbol{\beta}}) - \hat{\phi}_{adj+}(t; \boldsymbol{\beta}_0)\}$  and  $\sqrt{nh}\{\hat{\phi}_{adj+}(t; \boldsymbol{\beta}_0) - \phi_{adj}(t; \boldsymbol{\beta}_0)\}$  is  $\sigma_{AC}(t; h)B^{-2}(t)$ , where

$$\begin{aligned} \sigma_C^2(t; h) &= h\mathbf{D}(t; \boldsymbol{\beta}_0)^T I^{-1}(\boldsymbol{\beta}_0)\mathbf{D}(t; \boldsymbol{\beta}_0), \\ \sigma_{AC}(t; h) &= h\mathbf{D}(t; \boldsymbol{\beta}_0)^T E[\Delta_i K_h(t - X_i)\{1 - \phi_{adj}(t) - \exp(-\boldsymbol{\beta}_0 \mathbf{Z}_i)\} \mathbf{l}_\beta(X_i)], \end{aligned}$$

where  $\mathbf{l}_\beta(X_i)$  is the efficient influence function for  $\boldsymbol{\beta}$  in the logistic model. We substitute the parameters and expectations with respective (empirical) estimators to obtain  $\hat{\sigma}_+^{*2}(t; h)$ .

Similarly we can estimate the variance of  $\widehat{\phi}_{adj-}(t; \widehat{\boldsymbol{\beta}}; \widehat{\boldsymbol{\gamma}})$  with finite sampling correction.

Recall that

$$\sqrt{nh}\{\widehat{\phi}_{adj-}(t; \widehat{\boldsymbol{\beta}}, \widehat{\boldsymbol{\gamma}}) - \phi_{adj}(t)\} = -\sqrt{nh}\{\overline{E}_n(t; \widehat{\boldsymbol{\gamma}}) - \psi^{-1}(t)v(t)\overline{A}_n(t; \widehat{\boldsymbol{\beta}}, \widehat{\boldsymbol{\gamma}})\}\overline{A}_n^{-1}(t; \widehat{\boldsymbol{\beta}}, \widehat{\boldsymbol{\gamma}}).$$

Let

$$\begin{aligned}\widetilde{E}_n(t; \boldsymbol{\beta}, \boldsymbol{\gamma}) &= \overline{E}_n(t; \boldsymbol{\gamma}) - \psi^{-1}(t)v(t)\overline{A}_n(t; \boldsymbol{\beta}, \boldsymbol{\gamma}) \\ &= \frac{1}{n} \sum_{i=1}^n (1 - \Delta_i) K_h(t - X_i) \{\exp(\boldsymbol{\gamma}^T \mathbf{U}_i) - \psi^{-1}(t)v(t) \exp(\boldsymbol{\beta}^T \mathbf{Z}_i + \boldsymbol{\gamma}^T \mathbf{U}_i)\}, \\ \widetilde{F}_n(t) &= \widetilde{E}_n(t; \widehat{\boldsymbol{\beta}}, \widehat{\boldsymbol{\gamma}}) - \widetilde{E}_n(t; \boldsymbol{\beta}_0, \boldsymbol{\gamma}_0) = \overline{F}_n(t) - \psi^{-1}(t)v(t)\overline{C}_n(t).\end{aligned}$$

Then

$$\begin{aligned}\sqrt{nh}\{\overline{E}_n(t; \widehat{\boldsymbol{\gamma}}) - \psi^{-1}(t)v(t)\overline{A}_n(t; \widehat{\boldsymbol{\beta}}, \widehat{\boldsymbol{\gamma}})\} &= \sqrt{nh}\widetilde{E}_n(t; \boldsymbol{\beta}_0, \boldsymbol{\gamma}_0) + \sqrt{nh}\widetilde{F}_n(t) \\ &= \sum_{i=1}^n e_{n,i}(t) + \sum_{i=1}^n f_{n,i}(t) + o_p(1),\end{aligned}$$

where

$$\begin{aligned}e_{n,i}(t) &= \sqrt{\frac{h}{n}}(1 - \Delta_i) K_h(t - X_i) \{\exp(\boldsymbol{\gamma}_0^T \mathbf{U}_i) - \psi^{-1}(t)v(t) \exp(\boldsymbol{\beta}_0^T \mathbf{Z}_i + \boldsymbol{\gamma}_0^T \mathbf{U}_i)\}, \\ f_{n,i}(t) &= \sqrt{\frac{h}{n}} \{\mathbf{l}_{\boldsymbol{\gamma}}(X_i)^T \overline{\mathbf{G}}(t; \boldsymbol{\gamma}_0) - \psi^{-1}(t)v(t) \mathbf{l}_{\boldsymbol{\theta}}(X_i)^T \overline{\mathbf{D}}(t; \boldsymbol{\theta}_0)\}.\end{aligned}$$

Therefore, the limiting variance of  $\sqrt{nh}\{\overline{E}_n(t; \widehat{\boldsymbol{\gamma}}) - \psi^{-1}(t)v(t)\overline{A}_n(t; \widehat{\boldsymbol{\beta}}, \widehat{\boldsymbol{\gamma}})\}/\overline{A}_n(t; \widehat{\boldsymbol{\beta}}, \widehat{\boldsymbol{\gamma}})$  under finite sampling is  $\{\sigma_E^2(t) + \sigma_F^2(t; h) + 2\sigma_{EF}(t; h)\}/\overline{A}^2(t)$ , where

$$\begin{aligned}\sigma_E^2(t) &= \overline{B}(t) \int K^2(u) du \int \int \{\exp(\boldsymbol{\gamma}_0^T \mathbf{u}) - \psi^{-1}(t)v(t) \exp(\boldsymbol{\beta}_0^T \mathbf{z} + \boldsymbol{\gamma}_0^T \mathbf{u})\}^2 f_{\mathbf{Z}, \mathbf{U}|T \geq t}(\mathbf{z}, \mathbf{u}) d\mathbf{z} d\mathbf{u}, \\ \sigma_F^2(t; h) &= hE\{\mathbf{l}_{\boldsymbol{\gamma}}(X_i)^T \overline{\mathbf{G}}(t; \boldsymbol{\gamma}_0) - \psi^{-1}(t)v(t) \mathbf{l}_{\boldsymbol{\theta}}(X_i)^T \overline{\mathbf{D}}(t; \boldsymbol{\theta}_0)\}^2, \\ \sigma_{EF}(t; h) &= nE\{e_{n,i}(t) f_{n,i}(t)\}.\end{aligned}$$

We substitute the parameters and expectations with respective (empirical) estimators to obtain  $\widehat{\sigma}_w^{*2}(t; h)$ .

To obtain the limiting variance of  $\widehat{\phi}_{adjw}(t; \widehat{\boldsymbol{\beta}}; \widehat{\boldsymbol{\gamma}})$  under finite sampling, write

$$\begin{aligned} & \sqrt{nh}\{\widehat{\phi}_{adjw}(t; \widehat{\boldsymbol{\beta}}, \widehat{\boldsymbol{\gamma}}) - \phi_{adj}(t)\} \\ = & \pi_0 \sqrt{nh}\{\widehat{\phi}_{adj+}(t; \widehat{\boldsymbol{\beta}}) - \phi_{adj}(t)\} + (1 - \pi_0) \sqrt{nh}\{\widehat{\phi}_{adj-}(t; \widehat{\boldsymbol{\beta}}, \widehat{\boldsymbol{\gamma}}) - \phi_{adj}(t)\}. \end{aligned}$$

The variances of these two terms under finite sampling have been studied. Write the components into asymptotic *i.i.d.* forms

$$\begin{aligned} \sqrt{nh}\{\widehat{\phi}_{adj+}(t; \widehat{\boldsymbol{\beta}}) - \phi_{adj}(t)\} &= \sum_{i=1}^n a_{n,i}(t)B^{-1}(t) + \sum_{i=1}^n c_{n,i}(t)B^{-1}(t) + o_p(1), \\ \sqrt{nh}\{\widehat{\phi}_{adj-}(t; \widehat{\boldsymbol{\beta}}, \widehat{\boldsymbol{\gamma}}) - \phi_{adj}(t)\} &= -\sum_{i=1}^n e_{n,i}(t)\bar{A}^{-1}(t; \boldsymbol{\beta}_0, \boldsymbol{\gamma}_0) - \sum_{i=1}^n f_{n,i}(t)\bar{A}^{-1}(t; \boldsymbol{\beta}_0, \boldsymbol{\gamma}_0) + o_p(1), \end{aligned}$$

where  $a_{n,i}(t) = \sqrt{h/n}\{1 - \phi_{adj}(t) - \exp(-\boldsymbol{\beta}_0^T \mathbf{Z}_i)\} \Delta_i K_h(t - X_i)$  and  $c_{n,i}(t) = \sqrt{h/n} \mathbf{l}_{\boldsymbol{\beta}}(X_i)^T \mathbf{D}(t)$ . Then we obtain the covariance between  $\sqrt{nh}\{\widehat{\phi}_{adj+}(t; \widehat{\boldsymbol{\beta}}) - \phi_{adj}(t)\}$  and  $\sqrt{nh}\{\widehat{\phi}_{adj-}(t; \widehat{\boldsymbol{\beta}}, \widehat{\boldsymbol{\gamma}}) - \phi_{adj}(t)\}$  as

$$\begin{aligned} & -\left\{ \sigma_{AF}(t)\bar{A}^{-1}(t; \boldsymbol{\beta}_0, \boldsymbol{\gamma}_0)B^{-1}(t) + \sigma_{CE}(t)\bar{A}^{-1}(t; \boldsymbol{\beta}_0, \boldsymbol{\gamma}_0)B^{-1}(t) \right. \\ & \left. + \sigma_{CF}(t)\bar{A}^{-1}(t; \boldsymbol{\beta}_0, \boldsymbol{\gamma}_0)B^{-1}(t) \right\}, \end{aligned}$$

where  $\sigma_{AF}(t) = nE\{a_{n,i}(t)f_{n,i}(t)\}$ ,  $\sigma_{CE}(t) = nE\{c_{n,i}(t)e_{n,i}(t)\}$  and  $\sigma_{CF}(t) = nE\{c_{n,i}(t)f_{n,i}(t)\}$ .

We substitute the parameters and expectations with respective (empirical) estimators to obtain  $\widehat{\sigma}_w^{*2}(t; h)$ .



# **APPENDIX D: SUPPLEMENTARY RESULTS FOR THE SIMULATION STUDIES AND REAL DATA EX- AMPLE**

The additional results for the simulations and real data example are presented in Table A.1-A.9 and Figure A.1.

## APPENDIX E: THE TRUE VALUES OF $\phi_{adj}(t)$ AND $\Phi_{adj}(t)$ UNDER VARIOUS PARAMETER SPECIFICATIONS

To check the sensitivity of the proposed  $\phi_{adj}(t)$  against the rare disease assumption, we calculated differences between  $\phi_{adj}(t)$  and  $\Phi_{adj}(t)$  numerically under a wide range of scenarios. The results show that when disease probability  $\Pr(T < 70)$  is below 5%, the approximation is mostly satisfied with absolute difference below 0.05. When the disease probability increases, additional parameter restrictions need to be imposed to maintain a good approximation.

We consider the Cox model  $\lambda(t|Z, U) = \lambda_0(t) \exp(\beta Z + \gamma U)$  with a Weibull baseline hazard  $\lambda_0(t) = (\nu/\eta) (t/\eta)^{\nu-1}$ , a dichotomous exposure  $Z$  and a dichotomous confounder  $U$ . Let  $P_Z = \Pr\{Z = 1\}$ ,  $P_U = \Pr\{U = 1\}$ , and  $P_{ZU} = \Pr\{Z = 1, U = 1\}$  at baseline. Specifically, we set parameters as the combination of the following values:  $\eta = 90, 180, 360, 720$ ,  $\nu = 2$ ,  $\beta = 0.5, 1, 2, 4, 8$ ,  $\gamma = 0.5, 1, 2, 4, 8$ ,  $P_Z = 0.05, 0.1, 0.2, 0.4, 0.8$ ,  $P_U = 0.05, 0.1, 0.2, 0.4, 0.8$ , and  $D' = -1, -0.75, -0.5, -0.25, 0, 0.25, 0.5, 0.75, 1$ , where  $D'$  is the scaled correlation used for association of two binary variables (genetic variants) (Slatkin 2008) and here we use it for the association of  $Z$  and  $U$ , because it has a full range from -1 to 1. With the inclusion constraint of  $P_Z + P_U - P_{ZU} \leq 1$  and  $\Phi_{adj}(t) \geq 0$  at selected ages, a total of 17,581 scenarios are considered. For each scenario, we calculated  $\phi_{adj}(t)$ ,  $\Phi_{adj}(t)$ , and the difference  $\phi_{adj}(t) - \Phi_{adj}(t)$  at  $t = 30, 50, 70$ , respectively.

A total of 2,167 scenarios have the disease probability below 5%. Among them, only 48 scenarios have absolute difference above 0.05. These scenarios have the feature of  $\{\beta \leq 2, \gamma = 4, P_U = 0.05\}$ . For the remaining 2119 scenarios, we generated the scatter plots

for difference  $\phi_{adj}(t) - \Phi_{adj}(t)$  versus  $\Phi_{adj}(t)$  in Figure A.2, in which each point represents one scenario. From Figure A.2, the vast majority of scenarios have absolute difference very close to 0.

A total of 2,121 scenarios have the disease probability within the range of 5% to 10%. Among them, 180 scenarios having absolute difference above 0.05. These scenarios have the feature of  $\{\beta = 0.05, \gamma \geq 4, P_U \leq 0.1\}$ ,  $\{1 \leq \beta \leq 2, \gamma \geq 2, P_U \leq 0.1\}$ ,  $\{\beta = 4, \gamma \geq 2, P_Z \leq 0.1, P_U \leq 0.2\}$  or  $\{\beta = 8, \gamma = 8, P_Z = 0.05, P_U = 0.05\}$ .

A total of 2,269 scenarios have the disease probability within the range of 10% to 20%. Among them, 321 scenarios having absolute difference above 0.05. These scenarios have the feature of  $\{\beta = 0.05, \gamma \geq 4, P_U \leq 0.2\}$ ,  $\{1 \leq \beta \leq 2, \gamma \geq 2, P_U \leq 0.4\}$ ,  $\{\beta = 4, \gamma \geq 1, P_Z \leq 0.4, P_U \leq 0.4\}$  or  $\{\beta = 8, \gamma \geq 2, P_Z \leq 0.1\}$ .

In practice, if the disease probability is common, one should examine the parameter estimates. Generally speaking, if the effects of confounders and/or exposure are large, there might be a discrepancy between  $\phi_{adj}(t)$  and  $\Phi_{adj}(t)$  and one should be cautious to use  $\phi_{adj}(t)$  as an alternative.

## References

- Slatkin, M. (2008), ‘Linkage disequilibrium—understanding the evolutionary past and mapping the medical future’, *Nature Reviews Genetics* **9**(6), 477.
- Zhao, W., Chen, Y. Q. & Hsu, L. (2017), ‘On estimation of time-dependent attributable fraction from population-based case-control studies’, *Biometrics* **73**(3), 866–875.

Table A.1: Summary statistics for  $\hat{\phi}_{adjw}(t; \hat{\beta}, \hat{\gamma})$  with different bandwidth.  $h_{CV}$ : bandwidth from cross-validation. Bias: absolute difference between the true value of  $\phi_{adj}(t)$  and the mean of the point estimator. ESD: empirical standard deviation. ASE: mean of asymptotic-based standard error estimates. CR pointwise: coverage rate of 95% pointwise confidence intervals.

| Scenario I: binary $U$      |          |          |        |        |        |        |        |        |        |        |        |        |
|-----------------------------|----------|----------|--------|--------|--------|--------|--------|--------|--------|--------|--------|--------|
|                             | Age(yrs) | $h_{CV}$ | h=1    | h=2    | h=3    | h=4    | h=5    | h=6    | h=7    | h=8    | h=9    | h=10   |
| Bias                        | 30       | 0.000    | -0.002 | -0.001 | -0.001 | -0.001 | -0.001 | -0.001 | -0.001 | -0.001 | -0.001 | -0.001 |
|                             | 50       | 0.000    | -0.001 | -0.001 | -0.001 | -0.001 | -0.001 | -0.001 | -0.001 | -0.001 | -0.001 | -0.001 |
|                             | 70       | 0.000    | -0.002 | -0.003 | -0.002 | -0.002 | -0.001 | -0.001 | -0.001 | 0.000  | 0.000  | 0.000  |
| ESD                         | 30       | 0.025    | 0.044  | 0.035  | 0.032  | 0.030  | 0.028  | 0.028  | 0.027  | 0.026  | 0.026  | 0.026  |
|                             | 50       | 0.025    | 0.046  | 0.036  | 0.032  | 0.030  | 0.029  | 0.028  | 0.027  | 0.026  | 0.026  | 0.026  |
|                             | 70       | 0.028    | 0.063  | 0.047  | 0.040  | 0.036  | 0.034  | 0.032  | 0.031  | 0.030  | 0.029  | 0.028  |
| ASE                         | 30       | 0.026    | 0.043  | 0.035  | 0.031  | 0.029  | 0.028  | 0.027  | 0.027  | 0.026  | 0.026  | 0.026  |
|                             | 50       | 0.026    | 0.046  | 0.036  | 0.032  | 0.030  | 0.029  | 0.028  | 0.027  | 0.026  | 0.026  | 0.026  |
|                             | 70       | 0.028    | 0.062  | 0.047  | 0.040  | 0.036  | 0.034  | 0.032  | 0.031  | 0.030  | 0.029  | 0.028  |
| CR(%)<br>pointwise          | 30       | 95.4     | 94.2   | 95.0   | 94.8   | 94.7   | 95.0   | 95.3   | 95.3   | 95.2   | 95.0   | 95.2   |
|                             | 50       | 95.1     | 94.0   | 94.8   | 95.1   | 94.8   | 94.8   | 94.3   | 94.5   | 94.8   | 94.6   | 94.5   |
|                             | 70       | 95.4     | 93.6   | 94.5   | 94.7   | 94.9   | 95.4   | 95.3   | 95.6   | 95.1   | 95.1   | 95.4   |
| Scenario II: continuous $U$ |          |          |        |        |        |        |        |        |        |        |        |        |
|                             | Age(yrs) | $h_{CV}$ | h=1    | h=2    | h=3    | h=4    | h=5    | h=6    | h=7    | h=8    | h=9    | h=10   |
| Bias                        | 30       | 0.000    | -0.001 | -0.001 | 0.000  | 0.000  | -0.001 | -0.001 | -0.001 | -0.001 | -0.001 | -0.001 |
|                             | 50       | 0.000    | -0.001 | -0.001 | -0.001 | -0.001 | -0.001 | 0.000  | 0.000  | 0.000  | 0.000  | 0.000  |
|                             | 70       | 0.000    | -0.001 | -0.001 | -0.001 | -0.001 | -0.001 | -0.001 | 0.000  | 0.000  | 0.000  | 0.000  |
| ESD                         | 30       | 0.026    | 0.046  | 0.035  | 0.032  | 0.030  | 0.028  | 0.028  | 0.027  | 0.026  | 0.026  | 0.026  |
|                             | 50       | 0.026    | 0.045  | 0.035  | 0.031  | 0.029  | 0.028  | 0.027  | 0.026  | 0.026  | 0.025  | 0.025  |
|                             | 70       | 0.028    | 0.057  | 0.043  | 0.037  | 0.034  | 0.032  | 0.031  | 0.030  | 0.029  | 0.028  | 0.028  |
| ASE                         | 30       | 0.026    | 0.045  | 0.036  | 0.032  | 0.030  | 0.029  | 0.028  | 0.027  | 0.027  | 0.026  | 0.026  |
|                             | 50       | 0.026    | 0.045  | 0.036  | 0.032  | 0.030  | 0.029  | 0.028  | 0.027  | 0.026  | 0.026  | 0.026  |
|                             | 70       | 0.027    | 0.056  | 0.043  | 0.037  | 0.034  | 0.032  | 0.031  | 0.029  | 0.029  | 0.028  | 0.027  |
| CR(%)<br>pointwise          | 30       | 94.3     | 93.9   | 95.0   | 95.9   | 95.3   | 95.3   | 95.1   | 94.9   | 95.0   | 95.0   | 95.2   |
|                             | 50       | 94.9     | 94.5   | 94.8   | 95.5   | 95.8   | 95.7   | 95.9   | 95.7   | 95.5   | 95.6   | 95.6   |
|                             | 70       | 94.7     | 93.8   | 95.5   | 95.1   | 94.8   | 94.5   | 94.7   | 94.6   | 94.7   | 95.0   | 95.5   |

Table A.2: Estimates and the 95% confidence intervals of  $\phi_{adj}(t)$  and the model-based adjusted PAF for the colorectal cancer case-control study

| Parameter               | History of diabetes     |               | Obesity   |              |
|-------------------------|-------------------------|---------------|-----------|--------------|
|                         | Estimate                | 95% CI        | Estimate  | 95% CI       |
| $\hat{\phi}_{adjw}(50)$ | 0.020                   | 0.005, 0.035  | 0.070     | 0.005, 0.035 |
| $\hat{\phi}_{adjw}(60)$ | 0.025                   | 0.012, 0.038  | 0.050     | 0.012, 0.038 |
| $\hat{\phi}_{adjw}(70)$ | 0.028                   | 0.014, 0.042  | 0.044     | 0.014, 0.042 |
| $\hat{\phi}_{adjw}(80)$ | 0.028                   | 0.014, 0.042  | 0.037     | 0.014, 0.042 |
| $\hat{\phi}_{adjw}(90)$ | 0.025                   | 0.008, 0.041  | 0.032     | 0.008, 0.041 |
| $\widehat{PAF}_{adj}$   | 0.027                   | -0.002, 0.056 | 0.043     | 0.002, 0.083 |
| Parameter               | Year-since-quit-smoking |               | Pack year |              |
|                         | Estimate                | 95% CI        | Estimate  | 95% CI       |
| $\hat{\phi}_{adjw}(50)$ | 0.058                   | -0.032, 0.149 | 0.151     | 0.076, 0.226 |
| $\hat{\phi}_{adjw}(60)$ | 0.045                   | -0.024, 0.114 | 0.151     | 0.079, 0.223 |
| $\hat{\phi}_{adjw}(70)$ | 0.037                   | -0.020, 0.094 | 0.153     | 0.081, 0.226 |
| $\hat{\phi}_{adjw}(80)$ | 0.030                   | -0.017, 0.078 | 0.144     | 0.075, 0.213 |
| $\hat{\phi}_{adjw}(90)$ | 0.023                   | -0.015, 0.061 | 0.137     | 0.067, 0.207 |
| $\widehat{PAF}_{adj}$   | 0.037                   | -0.029, 0.104 | 0.150     | 0.074, 0.226 |

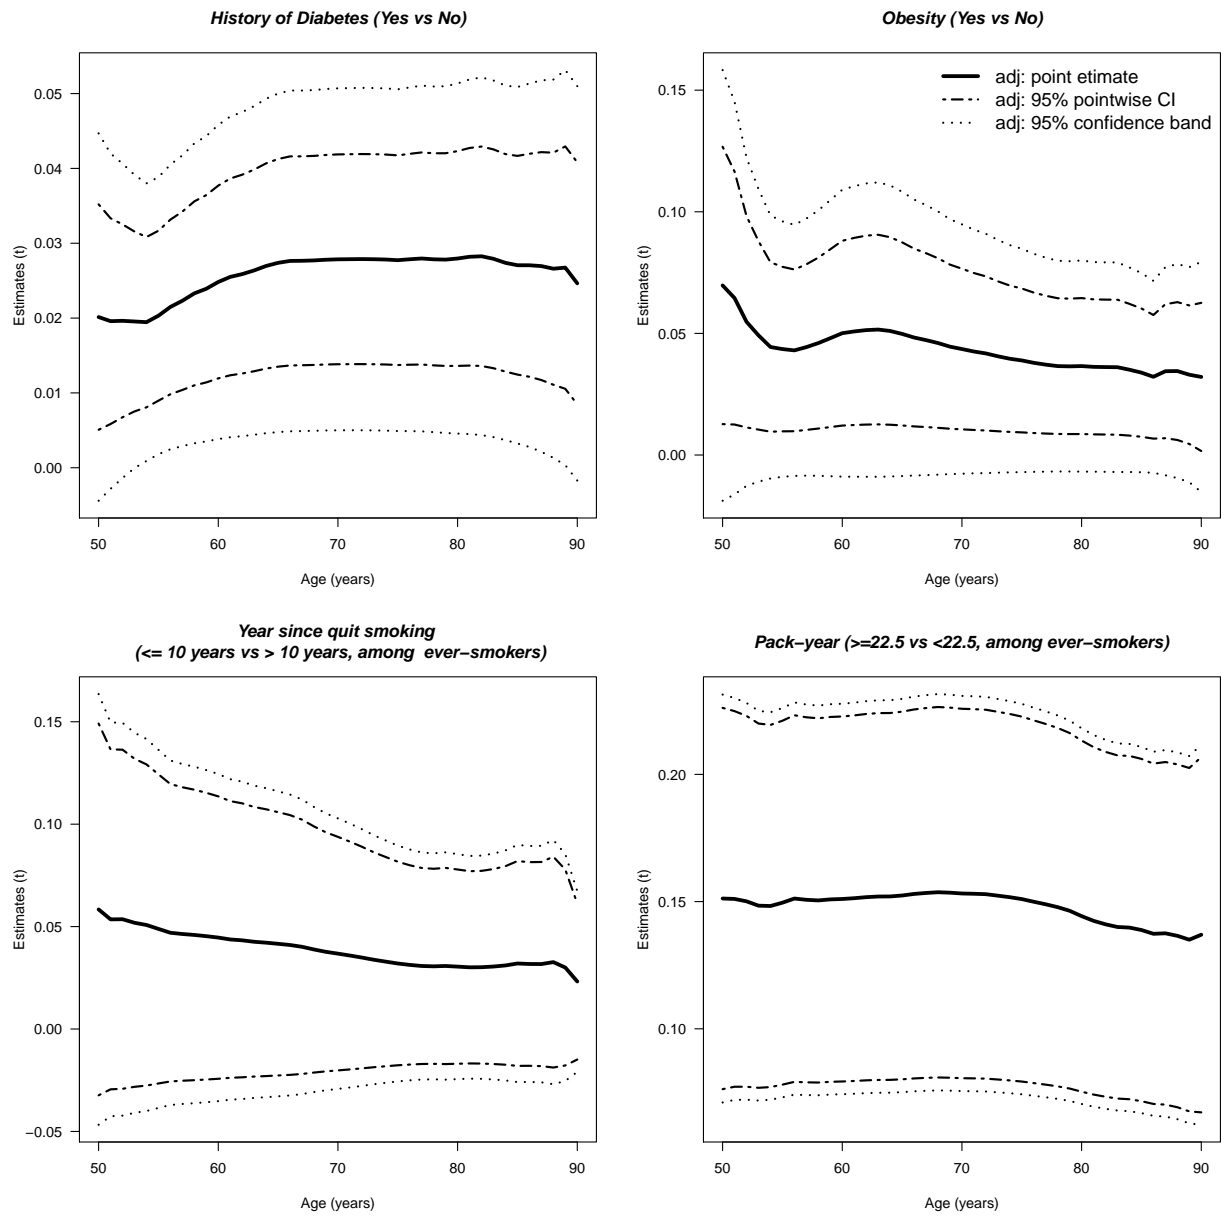

Figure A.1: The simultaneous confidence bands calculated based on bootstrap with 200 replicates and the pointwise confidence intervals of  $\phi_{adj}(t)$  for GECCO study

Table A.3: Summary statistics of the  $\phi_{adj}(t)$  estimators under scenario I and II for 70% censoring and equal number of cases and controls. Bias: absolute difference between the true value of  $\phi_{adj}(t)$  and the mean of the point estimator. ESD: empirical standard deviation. ASE: mean of asymptotic-based standard error estimates. CR pointwise: coverage rate of 95% pointwise confidence intervals. CR: coverage rate of 95% simultaneous confidence bands.

| Scenario I: binary $U$ |       |                     |                     |                     | Scenario II: continuous $U$ |                 |                     |                     |                     |
|------------------------|-------|---------------------|---------------------|---------------------|-----------------------------|-----------------|---------------------|---------------------|---------------------|
|                        | Age   | $\phi_{adj}(t)$     | $\Phi_{adj}(t)$     |                     | Age                         | $\phi_{adj}(t)$ | $\Phi_{adj}(t)$     |                     |                     |
|                        | 30    | 0.509               | 0.507               |                     | 30                          | 0.512           | 0.510               |                     |                     |
|                        | 50    | 0.491               | 0.486               |                     | 50                          | 0.497           | 0.492               |                     |                     |
|                        | 70    | 0.462               | 0.450               |                     | 70                          | 0.473           | 0.463               |                     |                     |
|                        | Age   | $\hat{\phi}_{adj+}$ | $\hat{\phi}_{adj-}$ | $\hat{\phi}_{adjw}$ |                             | Age             | $\hat{\phi}_{adj+}$ | $\hat{\phi}_{adj-}$ | $\hat{\phi}_{adjw}$ |
| Bias                   | 30    | -0.001              | -0.003              | -0.002              | Bias                        | 30              | 0.000               | -0.003              | -0.001              |
|                        | 50    | -0.001              | -0.003              | -0.002              |                             | 50              | -0.001              | -0.002              | -0.001              |
|                        | 70    | -0.001              | -0.002              | -0.001              |                             | 70              | -0.001              | -0.001              | -0.001              |
| ESD                    | 30    | 0.027               | 0.030               | 0.025               | ESD                         | 30              | 0.028               | 0.034               | 0.027               |
|                        | 50    | 0.026               | 0.032               | 0.025               |                             | 50              | 0.027               | 0.032               | 0.026               |
|                        | 70    | 0.028               | 0.037               | 0.027               |                             | 70              | 0.028               | 0.036               | 0.027               |
| ASE                    | 30    | 0.027               | 0.031               | 0.026               | ASE                         | 30              | 0.028               | 0.032               | 0.027               |
|                        | 50    | 0.027               | 0.030               | 0.025               |                             | 50              | 0.027               | 0.031               | 0.026               |
|                        | 70    | 0.028               | 0.034               | 0.026               |                             | 70              | 0.027               | 0.033               | 0.026               |
| CR(%)                  | 30    | 96.0                | 95.4                | 95.9                | CR(%)                       | 30              | 95.2                | 94.8                | 95.4                |
| pointwise              | 50    | 95.6                | 95.2                | 95.2                | pointwise                   | 50              | 95.6                | 94.9                | 95.7                |
|                        | 70    | 94.6                | 93.3                | 94.0                |                             | 70              | 94.3                | 94.7                | 95.2                |
| CR(%)                  | 20:70 | 94.8                | 94.9                | 95.0                | CR(%)                       | 20:70           | 93.9                | 94.4                | 95.6                |

Table A.4: Summary statistics of the  $\phi_{adj}(t)$  estimators under scenario I and II for 90% censoring and equal number of cases and controls. Bias: absolute difference between the true value of  $\phi_{adj}(t)$  and the mean of the point estimator. ESD: empirical standard deviation. ASE: mean of asymptotic-based standard error estimates. CR pointwise: coverage rate of 95% pointwise confidence intervals. CR: coverage rate of 95% simultaneous confidence bands.

| Scenario I: binary $U$ |       |                     |                     |                     | Scenario II: continuous $U$ |                 |                     |                     |                     |
|------------------------|-------|---------------------|---------------------|---------------------|-----------------------------|-----------------|---------------------|---------------------|---------------------|
|                        | Age   | $\phi_{adj}(t)$     | $\Phi_{adj}(t)$     |                     | Age                         | $\phi_{adj}(t)$ | $\Phi_{adj}(t)$     |                     |                     |
|                        | 30    | 0.517               | 0.516               |                     | 30                          | 0.518           | 0.518               |                     |                     |
|                        | 50    | 0.513               | 0.511               |                     | 50                          | 0.515           | 0.513               |                     |                     |
|                        | 70    | 0.506               | 0.503               |                     | 70                          | 0.509           | 0.507               |                     |                     |
|                        | Age   | $\hat{\phi}_{adj+}$ | $\hat{\phi}_{adj-}$ | $\hat{\phi}_{adjw}$ |                             | Age             | $\hat{\phi}_{adj+}$ | $\hat{\phi}_{adj-}$ | $\hat{\phi}_{adjw}$ |
| Bias                   | 30    | -0.001              | -0.004              | -0.001              | Bias                        | 30              | -0.002              | -0.004              | -0.003              |
|                        | 50    | 0.000               | -0.001              | -0.001              |                             | 50              | -0.001              | -0.003              | -0.001              |
|                        | 70    | 0.000               | -0.002              | -0.001              |                             | 70              | -0.001              | -0.003              | -0.001              |
| ESD                    | 30    | 0.029               | 0.036               | 0.027               | ESD                         | 30              | 0.030               | 0.036               | 0.028               |
|                        | 50    | 0.027               | 0.032               | 0.027               |                             | 50              | 0.028               | 0.032               | 0.027               |
|                        | 70    | 0.027               | 0.032               | 0.026               |                             | 70              | 0.028               | 0.033               | 0.026               |
| ASE                    | 30    | 0.029               | 0.033               | 0.027               | ASE                         | 30              | 0.030               | 0.035               | 0.028               |
|                        | 50    | 0.027               | 0.030               | 0.026               |                             | 50              | 0.028               | 0.031               | 0.026               |
|                        | 70    | 0.028               | 0.031               | 0.026               |                             | 70              | 0.027               | 0.031               | 0.026               |
| CR(%)<br>pointwise     | 30    | 94.2                | 93.3                | 94.2                | CR(%)<br>pointwise          | 30              | 95.6                | 94.2                | 93.7                |
|                        | 50    | 94.7                | 93.7                | 94.6                |                             | 50              | 94.2                | 94.8                | 94.5                |
|                        | 70    | 95.2                | 94.0                | 95.3                |                             | 70              | 94.4                | 94.4                | 94.5                |
| CR(%)                  | 20:70 | 94.4                | 93.9                | 94.3                | CR(%)                       | 20:70           | 94.5                | 93.4                | 93.5                |



Table A.5: Summary statistics of the  $\phi_{adj}(t)$  estimators under scenario I and II for 95% censoring and equal number of cases and controls. Bias: absolute difference between the true value of  $\phi_{adj}(t)$  and the mean of the point estimator. ESD: empirical standard deviation. ASE: mean of asymptotic-based standard error estimates. CR pointwise: coverage rate of 95% pointwise confidence intervals. CR: coverage rate of 95% simultaneous confidence bands.

| Scenario I: binary $U$ |       |                     |                     |                     | Scenario II: continuous $U$ |                 |                     |                     |                     |
|------------------------|-------|---------------------|---------------------|---------------------|-----------------------------|-----------------|---------------------|---------------------|---------------------|
|                        | Age   | $\phi_{adj}(t)$     | $\Phi_{adj}(t)$     |                     | Age                         | $\phi_{adj}(t)$ | $\Phi_{adj}(t)$     |                     |                     |
|                        | 30    | 0.517               | 0.516               |                     | 30                          | 0.518           | 0.518               |                     |                     |
|                        | 50    | 0.513               | 0.511               |                     | 50                          | 0.515           | 0.513               |                     |                     |
|                        | 70    | 0.506               | 0.503               |                     | 70                          | 0.509           | 0.507               |                     |                     |
|                        | Age   | $\hat{\phi}_{adj+}$ | $\hat{\phi}_{adj-}$ | $\hat{\phi}_{adjw}$ |                             | Age             | $\hat{\phi}_{adj+}$ | $\hat{\phi}_{adj-}$ | $\hat{\phi}_{adjw}$ |
| Bias                   | 30    | 0.001               | 0.000               | 0.000               | Bias                        | 30              | 0.000               | -0.001              | -0.001              |
|                        | 50    | 0.000               | -0.001              | -0.001              |                             | 50              | 0.000               | -0.001              | -0.001              |
|                        | 70    | 0.000               | -0.002              | 0.000               |                             | 70              | 0.001               | -0.002              | 0.000               |
| ESD                    | 30    | 0.028               | 0.031               | 0.026               | ESD                         | 30              | 0.028               | 0.032               | 0.027               |
|                        | 50    | 0.026               | 0.031               | 0.026               |                             | 50              | 0.028               | 0.031               | 0.027               |
|                        | 70    | 0.029               | 0.039               | 0.028               |                             | 70              | 0.031               | 0.035               | 0.028               |
| ASE                    | 30    | 0.027               | 0.030               | 0.026               | ASE                         | 30              | 0.028               | 0.031               | 0.027               |
|                        | 50    | 0.027               | 0.030               | 0.026               |                             | 50              | 0.027               | 0.031               | 0.026               |
|                        | 70    | 0.030               | 0.035               | 0.028               |                             | 70              | 0.029               | 0.034               | 0.027               |
| CR(%)                  | 30    | 93.7                | 95.1                | 94.8                | CR(%)                       | 30              | 94.0                | 95.0                | 94.3                |
| pointwise              | 50    | 95.8                | 94.7                | 96.3                | pointwise                   | 50              | 95.2                | 93.9                | 94.8                |
|                        | 70    | 94.9                | 94.5                | 94.1                |                             | 70              | 93.2                | 95.8                | 94.4                |
| CR(%)                  | 20:70 | 93.9                | 93.5                | 93.9                | CR(%)                       | 20:70           | 94.1                | 92.3                | 94.0                |

Table A.6: Summary statistics of the  $\phi_{adj}(t)$  estimators under scenario I and II for 80% censoring and 1000 controls. Bias: absolute difference between the true value of  $\phi_{adj}(t)$  and the mean of the point estimator. ESD: empirical standard deviation. ASE: mean of asymptotic-based standard error estimates. CR pointwise: coverage rate of 95% pointwise confidence intervals. CR: coverage rate of 95% simultaneous confidence bands.

| Scenario I: binary $U$ |       |                     |                     |                     | Scenario II: continuous $U$ |                 |                     |                     |                     |
|------------------------|-------|---------------------|---------------------|---------------------|-----------------------------|-----------------|---------------------|---------------------|---------------------|
|                        | Age   | $\phi_{adj}(t)$     | $\Phi_{adj}(t)$     |                     | Age                         | $\phi_{adj}(t)$ | $\Phi_{adj}(t)$     |                     |                     |
|                        | 30    | 0.509               | 0.507               |                     | 30                          | 0.512           | 0.510               |                     |                     |
|                        | 50    | 0.491               | 0.486               |                     | 50                          | 0.497           | 0.492               |                     |                     |
|                        | 70    | 0.462               | 0.450               |                     | 70                          | 0.473           | 0.463               |                     |                     |
|                        | Age   | $\hat{\phi}_{adj+}$ | $\hat{\phi}_{adj-}$ | $\hat{\phi}_{adjw}$ |                             | Age             | $\hat{\phi}_{adj+}$ | $\hat{\phi}_{adj-}$ | $\hat{\phi}_{adjw}$ |
| Bias                   | 30    | 0.000               | -0.002              | -0.001              | Bias                        | 30              | -0.001              | -0.003              | -0.001              |
|                        | 50    | 0.000               | -0.004              | -0.001              |                             | 50              | -0.001              | -0.003              | -0.001              |
|                        | 70    | 0.000               | -0.005              | -0.001              |                             | 70              | -0.001              | -0.005              | -0.001              |
| ESD                    | 30    | 0.029               | 0.038               | 0.028               | ESD                         | 30              | 0.030               | 0.038               | 0.029               |
|                        | 50    | 0.029               | 0.042               | 0.028               |                             | 50              | 0.029               | 0.040               | 0.029               |
|                        | 70    | 0.031               | 0.053               | 0.031               |                             | 70              | 0.033               | 0.050               | 0.031               |
| ASE                    | 30    | 0.030               | 0.036               | 0.029               | ASE                         | 30              | 0.030               | 0.037               | 0.029               |
|                        | 50    | 0.029               | 0.037               | 0.029               |                             | 50              | 0.030               | 0.037               | 0.029               |
|                        | 70    | 0.032               | 0.049               | 0.031               |                             | 70              | 0.032               | 0.045               | 0.030               |
| CR(%)<br>pointwise     | 30    | 97.3                | 94.7                | 96.5                | CR(%)<br>pointwise          | 30              | 95.6                | 93.6                | 94.9                |
|                        | 50    | 95.8                | 94.2                | 95.8                |                             | 50              | 95.3                | 94.6                | 95.0                |
|                        | 70    | 96.5                | 94.2                | 95.4                |                             | 70              | 95.3                | 95.0                | 95.0                |
| CR(%)                  | 20:70 | 96.0                | 95.1                | 95.4                | CR(%)                       | 20:70           | 96.0                | 94.6                | 95.3                |

Table A.7: Summary statistics of the  $\phi_{adj}(t)$  estimators under scenario I and II for 80% censoring and 4000 controls. Bias: absolute difference between the true value of  $\phi_{adj}(t)$  and the mean of the point estimator. ESD: empirical standard deviation. ASE: mean of asymptotic-based standard error estimates. CR pointwise: coverage rate of 95% pointwise confidence intervals. CR: coverage rate of 95% simultaneous confidence bands.

| Scenario I: binary $U$ |       |                     |                     |                     | Scenario II: continuous $U$ |                 |                     |                     |                     |
|------------------------|-------|---------------------|---------------------|---------------------|-----------------------------|-----------------|---------------------|---------------------|---------------------|
|                        | Age   | $\phi_{adj}(t)$     | $\Phi_{adj}(t)$     |                     | Age                         | $\phi_{adj}(t)$ | $\Phi_{adj}(t)$     |                     |                     |
|                        | 30    | 0.509               | 0.507               |                     | 30                          | 0.512           | 0.510               |                     |                     |
|                        | 50    | 0.491               | 0.486               |                     | 50                          | 0.497           | 0.492               |                     |                     |
|                        | 70    | 0.462               | 0.450               |                     | 70                          | 0.473           | 0.463               |                     |                     |
|                        | Age   | $\hat{\phi}_{adj+}$ | $\hat{\phi}_{adj-}$ | $\hat{\phi}_{adjw}$ |                             | Age             | $\hat{\phi}_{adj+}$ | $\hat{\phi}_{adj-}$ | $\hat{\phi}_{adjw}$ |
| Bias                   | 30    | 0.000               | -0.001              | -0.001              | Bias                        | 30              | -0.002              | -0.002              | -0.002              |
|                        | 50    | -0.002              | -0.001              | -0.001              |                             | 50              | -0.001              | -0.002              | -0.001              |
|                        | 70    | -0.001              | -0.004              | -0.002              |                             | 70              | -0.002              | -0.003              | -0.002              |
| ESD                    | 30    | 0.025               | 0.027               | 0.024               | ESD                         | 30              | 0.026               | 0.027               | 0.025               |
|                        | 50    | 0.026               | 0.027               | 0.024               |                             | 50              | 0.026               | 0.028               | 0.025               |
|                        | 70    | 0.031               | 0.034               | 0.027               |                             | 70              | 0.029               | 0.033               | 0.027               |
| ASE                    | 30    | 0.025               | 0.026               | 0.024               | ASE                         | 30              | 0.026               | 0.026               | 0.024               |
|                        | 50    | 0.025               | 0.026               | 0.024               |                             | 50              | 0.025               | 0.026               | 0.024               |
|                        | 70    | 0.029               | 0.031               | 0.026               |                             | 70              | 0.028               | 0.030               | 0.026               |
| CR(%)                  | 30    | 94.7                | 93.9                | 94.6                | CR(%)                       | 30              | 94.0                | 94.6                | 93.6                |
| pointwise              | 50    | 93.9                | 95.0                | 95.0                | pointwise                   | 50              | 93.7                | 93.6                | 93.6                |
|                        | 70    | 94.3                | 93.7                | 93.7                |                             | 70              | 94.0                | 92.2                | 93.8                |
| CR(%)                  | 20:70 | 93.2                | 93.7                | 93.7                | CR(%)                       | 20:70           | 93.6                | 92.8                | 93.5                |

Table A.8: Summary statistics of the estimators from simulated datasets based on real data for 1250 controls. Bias: absolute difference between the true value of  $\phi_{adj}(t)$  and the mean of the point estimator. ESD: sampling standard deviation. ASE: mean of asymptotic-based standard error estimates. CR pointwise: coverage rate of 95% pointwise confidence intervals. CR: coverage rate of 95% simultaneous confidence bands.

| Diabetes as the exposure |       |                     |                     |                     | Obesity as the exposure |                 |                     |                     |                     |
|--------------------------|-------|---------------------|---------------------|---------------------|-------------------------|-----------------|---------------------|---------------------|---------------------|
|                          | Age   | $\phi_{adj}(t)$     | $\Phi_{adj}(t)$     |                     | Age                     | $\phi_{adj}(t)$ | $\Phi_{adj}(t)$     |                     |                     |
|                          | 40    | .0269               | .0269               |                     | 40                      | .0408           | .0408               |                     |                     |
|                          | 60    | .0266               | .0266               |                     | 60                      | .0407           | .0407               |                     |                     |
|                          | 80    | .0253               | .0252               |                     | 80                      | .0403           | .0401               |                     |                     |
|                          | Age   | $\hat{\phi}_{adj+}$ | $\hat{\phi}_{adj-}$ | $\hat{\phi}_{adjw}$ |                         | Age             | $\hat{\phi}_{adj+}$ | $\hat{\phi}_{adj-}$ | $\hat{\phi}_{adjw}$ |
| Bias                     | 40    | -0.0002             | -0.0003             | -0.0002             | Bias                    | 40              | -0.0008             | -0.0006             | -0.0007             |
|                          | 60    | -0.0002             | -0.0003             | -0.0002             |                         | 60              | -0.0006             | -0.0005             | -0.0006             |
|                          | 80    | -0.0002             | 0.0002              | -0.0001             |                         | 80              | -0.0005             | -0.0010             | -0.0006             |
| ESD                      | 40    | 0.0094              | 0.0106              | 0.0090              | ESD                     | 40              | 0.0213              | 0.0217              | 0.0213              |
|                          | 60    | 0.0083              | 0.0087              | 0.0083              |                         | 60              | 0.0212              | 0.0212              | 0.0212              |
|                          | 80    | 0.0087              | 0.0101              | 0.0085              |                         | 80              | 0.0211              | 0.0211              | 0.0210              |
| ASE                      | 40    | 0.0095              | 0.0107              | 0.0093              | ASE                     | 40              | 0.0209              | 0.0211              | 0.0208              |
|                          | 60    | 0.0087              | 0.0089              | 0.0086              |                         | 60              | 0.0207              | 0.0208              | 0.0207              |
|                          | 80    | 0.0090              | 0.0102              | 0.0088              |                         | 80              | 0.0207              | 0.0207              | 0.0205              |
| CR(%)                    | 40    | 95.1                | 92.9                | 95.1                | CR(%)                   | 40              | 94.5                | 95.1                | 94.8                |
| pointwise                | 60    | 95.4                | 96.4                | 96.1                | pointwise               | 60              | 94.7                | 94.4                | 94.4                |
|                          | 80    | 95.6                | 94.0                | 96.5                |                         | 80              | 94.3                | 94.7                | 94.4                |
| CR(%)                    | 40:80 | 94.4                | 93.5                | 93.9                | CR(%)                   | 40:80           | 93.1                | 93.1                | 93.8                |

Table A.9: Summary statistics of the estimators from simulated datasets based on real data for 5000 controls. Bias: absolute difference between the true value of  $\phi_{adj}(t)$  and the mean of the point estimator. ESD: sampling standard deviation. ASE: mean of asymptotic-based standard error estimates. CR pointwise: coverage rate of 95% pointwise confidence intervals. CR: coverage rate of 95% simultaneous confidence bands.

| Diabetes as the exposure |       |                     |                     |                     | Obesity as the exposure |                 |                     |                     |                     |
|--------------------------|-------|---------------------|---------------------|---------------------|-------------------------|-----------------|---------------------|---------------------|---------------------|
|                          | Age   | $\phi_{adj}(t)$     | $\Phi_{adj}(t)$     |                     | Age                     | $\phi_{adj}(t)$ | $\Phi_{adj}(t)$     |                     |                     |
|                          | 40    | .0269               | .0269               |                     | 40                      | .0408           | .0408               |                     |                     |
|                          | 60    | .0266               | .0266               |                     | 60                      | .0407           | .0407               |                     |                     |
|                          | 80    | .0253               | .0252               |                     | 80                      | .0403           | .0401               |                     |                     |
|                          | Age   | $\hat{\phi}_{adj+}$ | $\hat{\phi}_{adj-}$ | $\hat{\phi}_{adjw}$ |                         | Age             | $\hat{\phi}_{adj+}$ | $\hat{\phi}_{adj-}$ | $\hat{\phi}_{adjw}$ |
| Bias                     | 40    | -0.0005             | -0.0004             | -0.0004             | Bias                    | 40              | -0.0006             | -0.0005             | -0.0005             |
|                          | 60    | -0.0004             | -0.0002             | -0.0003             |                         | 60              | -0.0006             | -0.0005             | -0.0005             |
|                          | 80    | 0.0000              | -0.0003             | -0.0003             |                         | 80              | -0.0004             | -0.0006             | -0.0005             |
| ESD                      | 40    | 0.0077              | 0.0072              | 0.0072              | ESD                     | 40              | 0.0159              | 0.0157              | 0.0157              |
|                          | 60    | 0.0067              | 0.0066              | 0.0065              |                         | 60              | 0.0156              | 0.0156              | 0.0156              |
|                          | 80    | 0.0078              | 0.0067              | 0.0066              |                         | 80              | 0.0156              | 0.0153              | 0.0153              |
| ASE                      | 40    | 0.0076              | 0.0071              | 0.0069              | ASE                     | 40              | 0.0152              | 0.0151              | 0.0151              |
|                          | 60    | 0.0066              | 0.0065              | 0.0065              |                         | 60              | 0.0150              | 0.0150              | 0.0150              |
|                          | 80    | 0.0072              | 0.0067              | 0.0066              |                         | 80              | 0.0151              | 0.0149              | 0.0148              |
| CR(%)                    | 40    | 93.8                | 94.7                | 95.0                | CR(%)                   | 40              | 94.5                | 94.4                | 94.4                |
| pointwise                | 60    | 95.2                | 95.2                | 95.3                | pointwise               | 60              | 94.2                | 94.5                | 94.4                |
|                          | 80    | 93.3                | 94.5                | 94.5                |                         | 80              | 94.5                | 93.9                | 94.8                |
| CR(%)                    | 40:80 | 94.1                | 93.6                | 93.1                | CR(%)                   | 40:80           | 93.8                | 93.1                | 93.9                |

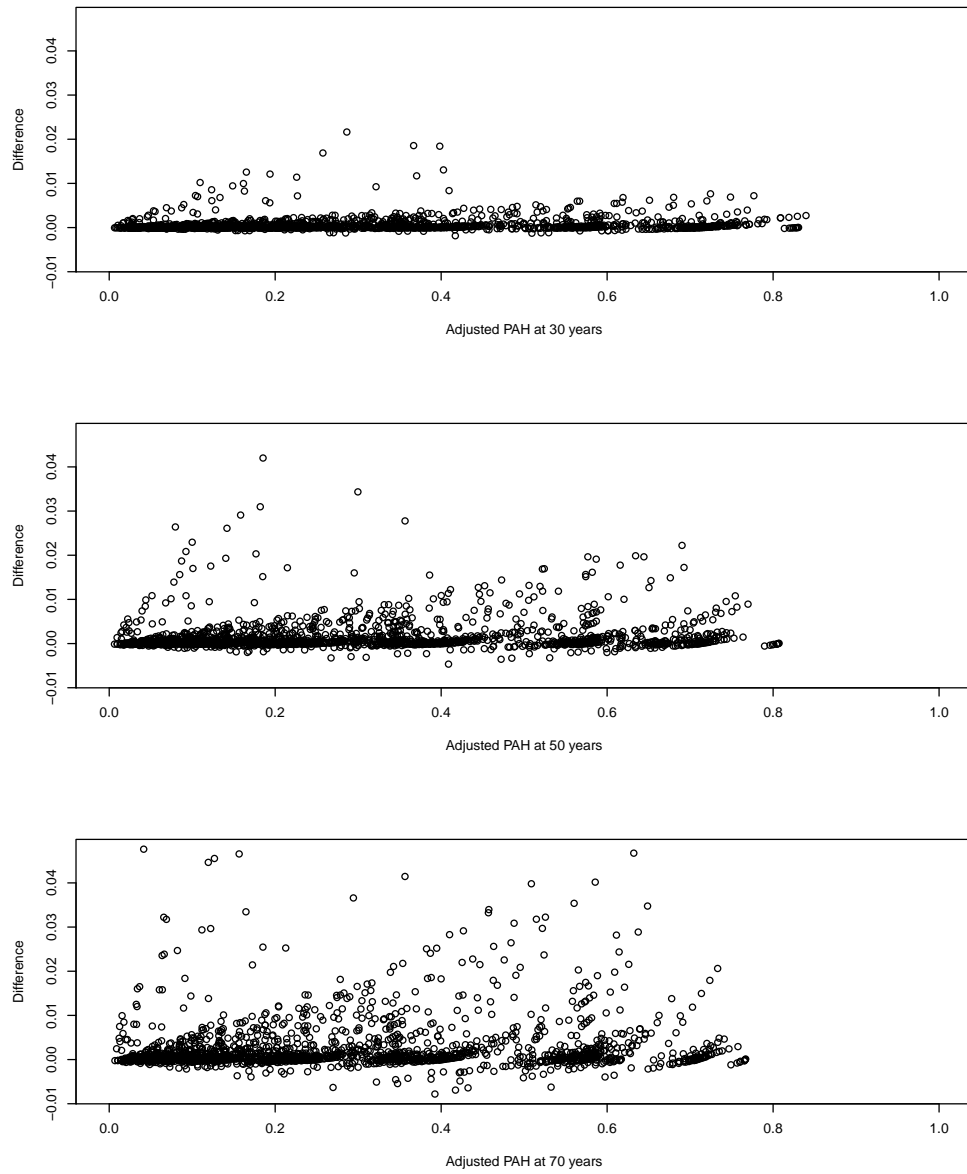

Figure A.2: The difference for the 2119 scenarios when the disease probability  $pr\{T \leq 70\} \leq 5\%$ . In each sub-graph, the horizontal axis is  $\Phi_{adj}(t)$  and the vertical axis is the difference  $\phi_{adj}(t) - \Phi_{adj}(t)$  at  $t = 30, 50, 70$ .
